# Supplementary material
Source: PubMed Central journal article supplement (PMC8321425)
Supplement: NIHMS1718504-supplement-Supplem_Tables_1-5.pdf [file NIHMS1718504-supplement-Supplem_Tables_1-5.pdf]

**Appendix A1: Descriptive demographic, comorbidity, and outcome statistics (n=50,861)**

| <b>Demographics</b>                                  | <b>Mean or Percent</b> |
|------------------------------------------------------|------------------------|
| Age (y), mean $\pm$ SD                               | 65.64 $\pm$ 9.42*      |
| Male                                                 | 49,629 (98)            |
| Female                                               | 1,232 (2)              |
| White                                                | 43,730 (86)            |
| Black                                                | 5,606 (11)             |
| Other                                                | 1,525 (3)              |
| <b>HbA1c Measures</b>                                |                        |
| <b>HbA1c Variability Measures mmol/mol (%)</b>       |                        |
| Standard deviation                                   | 0.81 $\pm$ 0.67        |
| Coefficient of variation                             | 10.78 $\pm$ 7.67       |
| Adjusted standard deviation                          | 1.29 $\pm$ 1.04        |
| <b>Mean HbA1c levels</b>                             |                        |
| <53 mmol/mol (<7%)                                   | 22,834 (45)            |
| $\geq$ 53 mmol/mol ( $\geq$ 7%) & <64 mmol/mol (<8%) | 19,214 (38)            |
| $\geq$ 64 mmol/mol ( $\geq$ 8%) & <75 mmol/mol (<9%) | 6,031 (12)             |
| $\geq$ 75 mmol/mol ( $\geq$ 9%)                      | 2,782 (5)              |
| <b>HbA1c Overall Trends mmol/mol (%)</b>             |                        |
| Slope coefficient                                    | -0.0005 $\pm$ 0.003    |
| <b>Diabetes Complications</b>                        |                        |
| Retinopathy complications <sup>†</sup>               | 12,312 (24)            |
| Nephropathy complications <sup>†</sup>               | 9,500 (19)             |
| Neuropathy complications <sup>†</sup>                | 17,749 (35)            |
| Cerebrovascular complications <sup>†</sup>           | 9,568 (19)             |
| Cardiovascular complications (some) <sup>†</sup>     | 12,568 (25)            |
| Cardiovascular complications (severe) <sup>†</sup>   | 16,262 (32)            |
| Peripheral vascular complications <sup>†</sup>       | 10,566 (21)            |
| Metabolic complications <sup>†</sup>                 | 792 (2)                |
| <b>Diabetes Management</b>                           |                        |
| Microalbumin missing                                 | 19,161 (38)            |
| Microalbumin normal                                  | 27,719 (54)            |
| Microalbumin high                                    | 3,981 (8)              |
| Serum creatinine missing                             | 861 (2)                |
| Serum creatinine normal                              | 45,646 (90)            |
| Serum creatinine high                                | 4,354 (9)              |
| Started sulfonylurea as second drug                  | 44,397 (87)            |
| Started thiazolidinones as second drug               | 3,722 (7)              |
| Started insulin as second drug                       | 2,742 (5)              |
| <b>Cardiovascular comorbidities</b>                  |                        |
| BMI missing                                          | 1,966 (4)              |
| BMI normal                                           | 4,443 (9)              |
| BMI overweight                                       | 16,080 (32)            |
| BMI obese                                            | 28,372 (56)            |
| Blood pressure missing                               | 38 (0)                 |
| Blood pressure normal                                | 32,890 (65)            |

|                                                                     |             |
|---------------------------------------------------------------------|-------------|
| High blood pressure                                                 | 17,933 (35) |
| LDL missing                                                         | 2,155 (4)   |
| Mean LDL ≤ 100                                                      | 29,632 (58) |
| Mean LDL > 100                                                      | 19,074 (38) |
| Congestive heart failure <sup>‡</sup>                               | 9,045 (18)  |
| Cardiac arrhythmias <sup>‡</sup>                                    | 15,046 (30) |
| Valvular disease <sup>‡</sup>                                       | 7,287 (14)  |
| Pulmonary circulatory disorder <sup>‡</sup>                         | 1,430 (3)   |
| Chronic pulmonary disease <sup>‡</sup>                              | 17,276 (34) |
| <b>Other comorbidities</b>                                          |             |
| Paralysis <sup>‡</sup>                                              | 1,350 (3)   |
| Other neurological disorder <sup>‡</sup>                            | 3,804 (7)   |
| Hypothyroidism <sup>‡</sup>                                         | 5,804 (11)  |
| Renal failure <sup>‡</sup>                                          | 4,049 (8)   |
| Liver disease <sup>‡</sup>                                          | 2,376 (5)   |
| Peptic Ulcer Excluding Bleeding <sup>‡</sup>                        | 2,107 (4)   |
| AIDS <sup>‡</sup>                                                   | 140 (0)     |
| Lymphoma <sup>‡</sup>                                               | 555 (1)     |
| Metastatic cancer <sup>‡</sup>                                      | 921 (2)     |
| Solid Tumor Without Metastasis <sup>‡</sup>                         | 10,905 (21) |
| Rheumatoid arthritis <sup>‡</sup>                                   | 2,202 (4)   |
| Coagulopathy <sup>‡</sup>                                           | 2,902 (6)   |
| Weight loss <sup>‡</sup>                                            | 2,417 (5)   |
| Fluid and electrolyte disorders <sup>‡</sup>                        | 8,551 (17)  |
| Blood loss anemias <sup>‡</sup>                                     | 1,039 (2)   |
| Deficiency anemias <sup>‡</sup>                                     | 10,919 (21) |
| Alcohol abuse <sup>‡</sup>                                          | 3,686 (7)   |
| Drug abuse <sup>‡</sup>                                             | 1,833 (4)   |
| Psychoses <sup>‡</sup>                                              | 8,927 (18)  |
| Depression <sup>‡</sup>                                             | 12,948 (25) |
| <b>Provider Process Quality Variables</b>                           |             |
| Provider % HbA1c ≥ 9% (≥ 75 mmol/mol) in baseline period, mean ± SD | 9 ± 4       |
| Provider BP % ≥ 140 or ≥ 90 in baseline period, mean ± SD           | 39 ± 7      |
| Provider LDL % > 100 in baseline period, mean ± SD                  | 39 ± 10     |
| <b>Outcomes</b>                                                     |             |
| All-cause mortality                                                 | 4,759 (9)   |
| ACSC hospitalization                                                | 9,261 (18)  |
| MI or stroke                                                        | 2,676 (5)   |

\*Values are n (%) unless indicated otherwise.

<sup>†</sup>Young severity index

<sup>‡</sup>Elixhauser comorbidity

**Table A2: Cox Proportional Hazard Model Predicting Mortality (n=50,861)\***

|                                                                       | Hazard Ratio | P< t   | 95% Confidence Interval |      |
|-----------------------------------------------------------------------|--------------|--------|-------------------------|------|
| <b>HbA1c Measures</b>                                                 |              |        |                         |      |
| <b>HbA1c Adjusted Standard Deviation (ref=Quartile 1: &lt;0.610%)</b> |              |        |                         |      |
| Quartile 2 (>=0.610 &<0.970)                                          | 1.00         | 0.986  | 0.92                    | 1.09 |
| Quartile 3 (>=0.970 &<1.600)                                          | 1.14         | 0.005  | 1.04                    | 1.25 |
| Quartile 4 (>=1.600)                                                  | 1.42         | <0.001 | 1.28                    | 1.58 |
| <b>HbA1c levels (ref=&lt;53 mmol/mol (&lt;7%))</b>                    |              |        |                         |      |
| >=53 mmol/mol (>=7%) &<64 mmol/mol (<8%)                              | 0.94         | 0.093  | 0.88                    | 1.01 |
| >=64 mmol/mol (>=8%) &<75 mmol/mol (<9%)                              | 0.94         | 0.243  | 0.84                    | 1.04 |
| >=75 mmol/mol (>=9%)                                                  | 1.24         | 0.002  | 1.08                    | 1.43 |
| <b>HbA1c slope (ref=Quartile 1; &lt;-0.001094%)</b>                   |              |        |                         |      |
| Quartile 2 (>=-0.001094 &<-0.0001268)                                 | 0.94         | 0.143  | 0.86                    | 1.02 |
| Quartile 3 (>=-0.0001268 &<0.0007676)                                 | 0.94         | 0.163  | 0.86                    | 1.03 |
| Quartile 4 (>=0.0007676)                                              | 1.02         | 0.674  | 0.94                    | 1.10 |
| Age                                                                   | 1.05         | <0.001 | 1.04                    | 1.05 |
| Male                                                                  | 1.36         | 0.013  | 1.07                    | 1.73 |
| White (ref=Black)                                                     | 1.10         | 0.072  | 0.99                    | 1.22 |
| Other                                                                 | 0.91         | 0.374  | 0.74                    | 1.12 |
| <b>Diabetes Complications</b>                                         |              |        |                         |      |
| Retinopathy complications <sup>†</sup>                                | 0.99         | 0.821  | 0.93                    | 1.06 |
| Nephropathy complications <sup>†</sup>                                | 1.00         | 0.954  | 0.92                    | 1.09 |
| Neuropathy complications <sup>†</sup>                                 | 0.97         | 0.270  | 0.91                    | 1.03 |
| Cerebrovascular complications <sup>†</sup>                            | 1.03         | 0.434  | 0.96                    | 1.11 |
| Cardiovascular complications (some) <sup>†</sup>                      | 0.96         | 0.360  | 0.89                    | 1.04 |
| Cardiovascular complications (severe) <sup>†</sup>                    | 1.10         | 0.051  | 1.00                    | 1.21 |
| Peripheral vascular complications <sup>†</sup>                        | 1.22         | <0.001 | 1.14                    | 1.30 |
| Metabolic complications <sup>†</sup>                                  | 0.89         | 0.265  | 0.73                    | 1.09 |
| <b>Diabetes Management</b>                                            |              |        |                         |      |
| Microalbumin missing (ref=microalbumin normal)                        | 1.17         | <0.001 | 1.09                    | 1.25 |
| Microalbumin high                                                     | 1.21         | <0.001 | 1.09                    | 1.35 |
| Serum creatinine missing (ref=serum creatinine normal)                | 1.16         | 0.169  | 0.94                    | 1.45 |
| Serum creatinine high                                                 | 1.24         | <0.001 | 1.13                    | 1.36 |
| Started thiazolidinones as second drug (ref=sulfonylurea)             | 0.90         | 0.060  | 0.80                    | 1.00 |
| Started insulin as second drug                                        | 1.31         | <0.001 | 1.17                    | 1.48 |
| <b>Cardiovascular comorbidities</b>                                   |              |        |                         |      |
| BMI missing (ref=BMI normal)                                          | 0.89         | 0.183  | 0.75                    | 1.06 |
| BMI overweight                                                        | 0.81         | <0.001 | 0.74                    | 0.88 |
| BMI obese                                                             | 0.78         | <0.001 | 0.71                    | 0.86 |
| Blood pressure missing                                                | 1.45         | 0.311  | 0.71                    | 2.96 |
| High blood pressure                                                   | 0.97         | 0.255  | 0.91                    | 1.03 |

|                                                                    |      |        |      |      |
|--------------------------------------------------------------------|------|--------|------|------|
| LDL missing                                                        | 1.13 | 0.078  | 0.99 | 1.29 |
| Mean LDL $\geq$ 100                                                | 1.09 | 0.006  | 1.03 | 1.16 |
| Congestive heart failure $\ddagger$                                | 1.39 | <0.001 | 1.27 | 1.52 |
| Cardiac arrhythmias $\ddagger$                                     | 1.11 | 0.003  | 1.04 | 1.19 |
| Valvular disease $\ddagger$                                        | 0.94 | 0.106  | 0.86 | 1.01 |
| Pulmonary circulatory disorder $\ddagger$                          | 1.42 | <0.001 | 1.24 | 1.63 |
| Chronic pulmonary disease $\ddagger$                               | 1.31 | <0.001 | 1.23 | 1.39 |
| <b>Other Comorbidities</b>                                         |      |        |      |      |
| Paralysis $\ddagger$                                               | 1.36 | <0.001 | 1.17 | 1.58 |
| Other neurological disorder $\ddagger$                             | 1.35 | <0.001 | 1.23 | 1.48 |
| Hypothyroidism $\ddagger$                                          | 0.86 | 0.001  | 0.78 | 0.94 |
| Renal failure $\ddagger$                                           | 1.17 | 0.005  | 1.05 | 1.31 |
| Liver disease $\ddagger$                                           | 1.42 | <0.001 | 1.25 | 1.60 |
| Peptic Ulcer Excluding Bleeding $\ddagger$                         | 0.92 | 0.213  | 0.81 | 1.05 |
| AIDS $\ddagger$                                                    | 0.87 | 0.661  | 0.46 | 1.63 |
| Lymphoma $\ddagger$                                                | 1.27 | 0.025  | 1.03 | 1.56 |
| Metastatic cancer $\ddagger$                                       | 3.87 | <0.001 | 3.42 | 4.38 |
| Solid Tumor Without Metastasis $\ddagger$                          | 1.21 | <0.001 | 1.13 | 1.29 |
| Rheumatoid arthritis $\ddagger$                                    | 0.87 | 0.044  | 0.76 | 1.00 |
| Coagulopathy $\ddagger$                                            | 1.20 | <0.001 | 1.09 | 1.33 |
| Weight loss $\ddagger$                                             | 1.38 | <0.001 | 1.25 | 1.54 |
| Fluid and electrolyte disorders $\ddagger$                         | 1.23 | <0.001 | 1.14 | 1.32 |
| Blood loss anemias $\ddagger$                                      | 1.15 | 0.073  | 0.99 | 1.34 |
| Deficiency anemias $\ddagger$                                      | 1.09 | 0.016  | 1.02 | 1.17 |
| Alcohol abuse $\ddagger$                                           | 1.32 | <0.001 | 1.17 | 1.48 |
| Drug abuse $\ddagger$                                              | 1.23 | 0.019  | 1.03 | 1.46 |
| Psychoses $\ddagger$                                               | 1.12 | 0.010  | 1.03 | 1.22 |
| Depression $\ddagger$                                              | 1.16 | <0.001 | 1.08 | 1.25 |
| <b>Provider Process Quality Variables</b>                          |      |        |      |      |
| Provider % HbA1c $\geq$ 9% ( $\geq$ 75mmol/mol) in baseline period | 1.37 | 0.439  | 0.62 | 3.03 |
| Provider BP % $\geq$ 140 and $\geq$ 90 in baseline period          | 1.21 | 0.440  | 0.75 | 1.96 |
| Provider LDL% > 100 in baseline period                             | 0.98 | 0.906  | 0.69 | 1.39 |

\*Year fixed effects not shown. Model also includes Veterans Affairs Medical Center random effects.

$\ddagger$ Young Severity Index

$\ddagger$ Elixhauser comorbidity

**Appendix A3: Cox Proportional Hazard Models: Effect of HbA1c variability and Levels on Mortality: Two year baseline (n=27,398)\***

| <b>Model 1**</b>                                                     | <b>Hazard Ratio</b> | <b>P&lt; t </b> | <b>95% Confidence Interval</b> |      |
|----------------------------------------------------------------------|---------------------|-----------------|--------------------------------|------|
| <b>HbA1c Standard Deviation (ref=Quartile 1: &lt;0.310%)</b>         |                     |                 |                                |      |
| Quartile 2 (>=0.310 &<0.500)                                         | 1.11                | 0.085           | 0.99                           | 1.25 |
| Quartile 3 (>=0.500 &<0.820)                                         | 1.15                | 0.030           | 1.01                           | 1.31 |
| Quartile 4 (>=0.820)                                                 | 1.36                | <0.001          | 1.18                           | 1.58 |
| <b>HbA1c levels (ref=&lt;7% (&lt;53 mmol/mol))</b>                   |                     |                 |                                |      |
| >7% (>=53 mmol/mol) &<8% (<64 mmol/mol)                              | 0.87                | 0.003           | 0.80                           | 0.95 |
| >=8% (>=64 mmol/mol)&<9% (<75 mmol/mol)                              | 0.99                | 0.938           | 0.86                           | 1.15 |
| >=9% (>=75 mmol/mol)                                                 | 1.16                | 0.146           | 0.95                           | 1.41 |
| <b>HbA1c slope (ref=Quartile 1: &lt;-0.000368%)</b>                  |                     |                 |                                |      |
| Quartile 2 (>=-0.000368 &<0.0006751)                                 | 1.00                | 0.995           | 0.89                           | 1.12 |
| Quartile 3 (>=0.0006751 &<0.0019423)                                 | 0.95                | 0.375           | 0.85                           | 1.06 |
| Quartile 4 (>=0.0019423)                                             | 1.04                | 0.551           | 0.92                           | 1.16 |
| <b>Model 2</b>                                                       |                     |                 |                                |      |
| <b>HbA1c Coefficient of Variation (ref=Quartile 1: &lt;04.49%)</b>   |                     |                 |                                |      |
| Quartile 2 (>=4.49 &<7.06)                                           | 1.18                | 0.005           | 1.05                           | 1.33 |
| Quartile 3 (>=7.06 &<11.22)                                          | 1.21                | 0.004           | 1.06                           | 1.37 |
| Quartile 4 (>=11.22)                                                 | 1.40                | <0.001          | 1.21                           | 1.62 |
| <b>HbA1c levels (ref=&lt;7% (&lt;53 mmol/mol))</b>                   |                     |                 |                                |      |
| >7% (>=53 mmol/mol) &<8% (<64 mmol/mol)                              | 0.89                | 0.007           | 0.81                           | 0.97 |
| >=8% (>=64 mmol/mol)&<9% (<75 mmol/mol)                              | 1.02                | 0.733           | 0.89                           | 1.18 |
| >=9% (>=75 mmol/mol)                                                 | 1.20                | 0.065           | 0.99                           | 1.46 |
| <b>HbA1c slope (ref=Quartile 1: &lt;-0.000368%)</b>                  |                     |                 |                                |      |
| Quartile 2 (>=-0.000368 &<0.0006751)                                 | 1.02                | 0.766           | 0.91                           | 1.14 |
| Quartile 3 (>=0.0006751 &<0.0019423)                                 | 0.94                | 0.298           | 0.84                           | 1.05 |
| Quartile 4 (>=0.0019423)                                             | 1.03                | 0.573           | 0.92                           | 1.16 |
| <b>Model 3</b>                                                       |                     |                 |                                |      |
| <b>HbA1c Adjusted Standard Deviation (ref=Quartile 1: &lt;0.30%)</b> |                     |                 |                                |      |
| Quartile 2 (>=0.30 &<0.48)                                           | 1.14                | 0.028           | 1.01                           | 1.28 |
| Quartile 3 (>=0.48 &<0.80)                                           | 1.16                | 0.023           | 1.02                           | 1.32 |
| Quartile 4 (>=0.80)                                                  | 1.35                | <0.001          | 1.16                           | 1.56 |
| <b>HbA1c levels (ref=&lt;7% (&lt;53 mmol/mol))</b>                   |                     |                 |                                |      |
| >7% (>=53 mmol/mol) &<8% (<64 mmol/mol)                              | 0.87                | 0.003           | 0.80                           | 0.95 |
| >=8% (>=64 mmol/mol)&<9% (<75 mmol/mol)                              | 1.00                | 0.979           | 0.87                           | 1.16 |
| >=9% (>=75 mmol/mol)                                                 | 1.17                | 0.119           | 0.96                           | 1.43 |
| <b>HbA1c slope (ref=Quartile 1: &lt;-0.000368%)</b>                  |                     |                 |                                |      |
| Quartile 2 (>=-0.000368 &<0.0006751)                                 | 1.00                | 0.982           | 0.89                           | 1.12 |
| Quartile 3 (>=0.0006751 &<0.0019423)                                 | 0.95                | 0.334           | 0.85                           | 1.06 |
| Quartile 4 (>=0.0019423)                                             | 1.04                | 0.451           | 0.93                           | 1.17 |

\*Models include baseline demographics, Elixhauser comorbidities, Young severity index, BMI, microalbumin, serum creatinine, blood pressure, LDL, starting a thiazolidinedione or insulin compared to sulfonylurea, provider quality controls, year fixed effects and Veterans Affairs Medical Center random effects.

\*\*The first model included **HbA1c** standard deviation, **HbA1c** levels, **HbA1c** slope and all the covariates above. A second model replaced **HbA1c** standard deviation with **HbA1c** coefficient of variation and a third model replaced **HbA1c** standard deviation with **HbA1c** adjusted standard deviation.

**Appendix A4: Cox Proportional Hazard Models: Effect of HbA1c variability and Levels on MI or Stroke (n=27,398): Two year baseline\***

| <b>Model 1**</b>                                                     | <b>Hazard Ratio</b> | <b>P&lt; t </b> | <b>95% Confidence Interval</b> |      |
|----------------------------------------------------------------------|---------------------|-----------------|--------------------------------|------|
| <b>HbA1c Standard Deviation (ref=Quartile 1: &lt;0.310%)</b>         |                     |                 |                                |      |
| Quartile 2 (>=0.310 &<0.500)                                         | 1.05                | 0.567           | 0.89                           | 1.23 |
| Quartile 3 (>=0.500 &<0.820)                                         | 1.17                | 0.071           | 0.99                           | 1.40 |
| Quartile 4 (>=0.820)                                                 | 1.24                | 0.035           | 1.02                           | 1.52 |
| <b>HbA1c levels (ref=&lt;7% (&lt;53 mmol/mol))</b>                   |                     |                 |                                |      |
| >7% (>=53 mmol/mol) &<8% (<64 mmol/mol)                              | 1.02                | 0.762           | 0.90                           | 1.15 |
| >=8% (>=64 mmol/mol)&<9% (<75 mmol/mol)                              | 1.29                | 0.008           | 1.07                           | 1.55 |
| >=9% (>=75 mmol/mol)                                                 | 1.64                | <0.001          | 1.27                           | 2.11 |
| <b>HbA1c slope (ref=Quartile 1: &lt;-0.000368%)</b>                  |                     |                 |                                |      |
| Quartile 2 (>=-0.000368 &<0.0006751)                                 | 1.09                | 0.299           | 0.93                           | 1.28 |
| Quartile 3 (>=0.0006751 &<0.0019423)                                 | 1.07                | 0.359           | 0.92                           | 1.25 |
| Quartile 4 (>=0.0019423)                                             | 1.16                | 0.053           | 1.00                           | 1.35 |
| <b>Model 2</b>                                                       |                     |                 |                                |      |
| <b>HbA1c Coefficient of Variation (ref=Quartile 1: &lt;04.49%)</b>   |                     |                 |                                |      |
| Quartile 2 (>=4.49 &<7.06)                                           | 0.99                | 0.889           | 0.84                           | 1.16 |
| Quartile 3 (>=7.06 &<11.22)                                          | 1.13                | 0.168           | 0.95                           | 1.34 |
| Quartile 4 (>=11.22)                                                 | 1.13                | 0.217           | 0.93                           | 1.37 |
| <b>HbA1c levels (ref=&lt;7% (&lt;53 mmol/mol))</b>                   |                     |                 |                                |      |
| >7% (>=53 mmol/mol) &<8% (<64 mmol/mol)                              | 1.04                | 0.521           | 0.92                           | 1.17 |
| >=8% (>=64 mmol/mol)&<9% (<75 mmol/mol)                              | 1.34                | 0.001           | 1.12                           | 1.61 |
| >=9% (>=75 mmol/mol)                                                 | 1.72                | <0.001          | 1.35                           | 2.21 |
| <b>HbA1c slope (ref=Quartile 1: &lt;-0.000368%)</b>                  |                     |                 |                                |      |
| Quartile 2 (>=-0.000368 &<0.0006751)                                 | 1.07                | 0.431           | 0.91                           | 1.25 |
| Quartile 3 (>=0.0006751 &<0.0019423)                                 | 1.07                | 0.381           | 0.92                           | 1.25 |
| Quartile 4 (>=0.0019423)                                             | 1.18                | 0.035           | 1.01                           | 1.37 |
| <b>Model 3</b>                                                       |                     |                 |                                |      |
| <b>HbA1c Adjusted Standard Deviation (ref=Quartile 1: &lt;0.30%)</b> |                     |                 |                                |      |
| Quartile 2 (>=0.30 &<0.48)                                           | 1.12                | 0.157           | 0.96                           | 1.32 |
| Quartile 3 (>=0.48 &<0.80)                                           | 1.19                | 0.050           | 1.00                           | 1.42 |
| Quartile 4 (>=0.80)                                                  | 1.26                | 0.027           | 1.03                           | 1.54 |
| <b>HbA1c levels (ref=&lt;7% (&lt;53 mmol/mol))</b>                   |                     |                 |                                |      |
| >7% (>=53 mmol/mol) &<8% (<64 mmol/mol)                              | 1.02                | 0.772           | 0.90                           | 1.15 |
| >=8% (>=64 mmol/mol)&<9% (<75 mmol/mol)                              | 1.30                | 0.006           | 1.08                           | 1.56 |
| >=9% (>=75 mmol/mol)                                                 | 1.65                | <0.001          | 1.28                           | 2.13 |
| <b>HbA1c slope (ref=Quartile 1: &lt;-0.000368%)</b>                  |                     |                 |                                |      |
| Quartile 2 (>=-0.000368 &<0.0006751)                                 | 1.10                | 0.264           | 0.93                           | 1.29 |
| Quartile 3 (>=0.0006751 &<0.0019423)                                 | 1.06                | 0.420           | 0.91                           | 1.24 |
| Quartile 4 (>=0.0019423)                                             | 1.17                | 0.040           | 1.01                           | 1.36 |

\*Models include baseline demographics, Elixhauser comorbidities, Young severity index, BMI, microalbumin, serum creatinine, blood pressure, LDL, starting a thiazolidinedione or insulin compared to sulfonylurea, provider quality controls, year fixed effects and Veterans Affairs Medical Center random effects.

\*\*The first model included **HbA1c** standard deviation, **HbA1c** levels, **HbA1c** slope and all the covariates above. A second model replaced **HbA1c** standard deviation with **HbA1c** coefficient of variation and a third model replaced **HbA1c** standard deviation with **HbA1c** adjusted standard deviation.



**Appendix A5: Cox Proportional Hazard Models: Effect of HbA1c variability and Levels on ACSC Hospitalization: Two Year Baseline (n=27,398)\***

| <b>Model 1**</b>                                                     | <b>Hazard Ratio</b> | <b>P&lt; t </b> | <b>95% Confidence Interval</b> |      |
|----------------------------------------------------------------------|---------------------|-----------------|--------------------------------|------|
| <b>HbA1c Standard Deviation (ref=Quartile 1: &lt;0.310%)</b>         |                     |                 |                                |      |
| Quartile 2 (>=0.310 &<0.500)                                         | 1.01                | 0.770           | 0.93                           | 1.10 |
| Quartile 3 (>=0.500 &<0.820)                                         | 1.09                | 0.051           | 1.00                           | 1.20 |
| Quartile 4 (>=0.820)                                                 | 1.10                | 0.085           | 0.99                           | 1.22 |
| <b>HbA1c levels (ref=&lt;7% (&lt;53 mmol/mol))</b>                   |                     |                 |                                |      |
| >7% (>=53 mmol/mol) &<8% (<64 mmol/mol)                              | 0.96                | 0.170           | 0.90                           | 1.02 |
| >=8% (>=64 mmol/mol)&<9% (<75 mmol/mol)                              | 1.11                | 0.051           | 1.00                           | 1.23 |
| >=9% (>=75 mmol/mol)                                                 | 1.12                | 0.123           | 0.97                           | 1.31 |
| <b>HbA1c slope (ref=Quartile 1: &lt;-0.000368%)</b>                  |                     |                 |                                |      |
| Quartile 2 (>=-0.000368 &<0.0006751)                                 | 0.92                | 0.033           | 0.84                           | 0.99 |
| Quartile 3 (>=0.0006751 &<0.0019423)                                 | 0.87                | <0.001          | 0.80                           | 0.94 |
| Quartile 4 (>=0.0019423)                                             | 0.93                | 0.089           | 0.86                           | 1.01 |
| <b>Model 2</b>                                                       |                     |                 |                                |      |
| <b>HbA1c Coefficient of Variation (ref=Quartile 1: &lt;04.49%)</b>   |                     |                 |                                |      |
| Quartile 2 (>=4.49 &<7.06)                                           | 1.02                | 0.719           | 0.93                           | 1.10 |
| Quartile 3 (>=7.06 &<11.22)                                          | 1.11                | 0.019           | 1.02                           | 1.21 |
| Quartile 4 (>=11.22)                                                 | 1.15                | 0.007           | 1.04                           | 1.27 |
| <b>HbA1c levels (ref=&lt;7% (&lt;53 mmol/mol))</b>                   |                     |                 |                                |      |
| >7% (>=53 mmol/mol) &<8% (<64 mmol/mol)                              | 0.96                | 0.199           | 0.90                           | 1.02 |
| >=8% (>=64 mmol/mol)&<9% (<75 mmol/mol)                              | 1.10                | 0.048           | 1.00                           | 1.22 |
| >=9% (>=75 mmol/mol)                                                 | 1.12                | 0.129           | 0.97                           | 1.30 |
| <b>HbA1c slope (ref=Quartile 1: &lt;-0.000368%)</b>                  |                     |                 |                                |      |
| Quartile 2 (>=-0.000368 &<0.0006751)                                 | 0.93                | 0.072           | 0.85                           | 1.01 |
| Quartile 3 (>=0.0006751 &<0.0019423)                                 | 0.87                | 0.001           | 0.81                           | 0.95 |
| Quartile 4 (>=0.0019423)                                             | 0.92                | 0.043           | 0.85                           | 1.00 |
| <b>Model 3</b>                                                       |                     |                 |                                |      |
| <b>HbA1c Adjusted Standard Deviation (ref=Quartile 1: &lt;0.30%)</b> |                     |                 |                                |      |
| Quartile 2 (>=0.30 &<0.48)                                           | 1.03                | 0.559           | 0.94                           | 1.11 |
| Quartile 3 (>=0.48 &<0.80)                                           | 1.10                | 0.039           | 1.00                           | 1.20 |
| Quartile 4 (>=0.80)                                                  | 1.11                | 0.060           | 1.00                           | 1.23 |
| <b>HbA1c levels (ref=&lt;7% (&lt;53 mmol/mol))</b>                   |                     |                 |                                |      |
| >7% (>=53 mmol/mol) &<8% (<64 mmol/mol)                              | 0.96                | 0.159           | 0.90                           | 1.02 |
| >=8% (>=64 mmol/mol)&<9% (<75 mmol/mol)                              | 1.11                | 0.054           | 1.00                           | 1.22 |
| >=9% (>=75 mmol/mol)                                                 | 1.12                | 0.128           | 0.97                           | 1.30 |
| <b>HbA1c slope (ref=Quartile 1: &lt;-0.000368%)</b>                  |                     |                 |                                |      |
| Quartile 2 (>=-0.000368 &<0.0006751)                                 | 0.92                | 0.041           | 0.85                           | 1.00 |
| Quartile 3 (>=0.0006751 &<0.0019423)                                 | 0.87                | <0.001          | 0.80                           | 0.94 |
| Quartile 4 (>=0.0019423)                                             | 0.93                | 0.089           | 0.86                           | 1.01 |

\*Models include baseline demographics, Elixhauser comorbidities, Young severity index, BMI, microalbumin, serum creatinine, blood pressure, LDL, starting a thiazolidinedione or insulin compared to sulfonylurea, provider quality controls, year fixed effects and Veterans Affairs Medical Center random effects.

\*\*The first model included **HbA1c** standard deviation, **HbA1c** levels, **HbA1c** slope and all the covariates above. A second model replaced **HbA1c** standard deviation with **HbA1c** coefficient of variation and a third model replaced **HbA1c** standard deviation with **HbA1c** adjusted standard deviation.
